# Supplementary material for: Ancestry specific distribution of LPA Kringle IV-Type-2 genetic variants highlight associations to apo(a) copy number, glucose, and hypertension
Source: PubMed Central journal article supplement — medRxiv. 2024 Jul 10:2024.07.09.24310176. Preprint. [Version 1] doi: 10.1101/2024.07.09.24310176 (PMC11261928; doi:10.1101/2024.07.09.24310176), 2024-07-10
Supplement: NIHPP2024.07.09.24310176v1-supplement-1.pdf [file NIHPP2024.07.09.24310176v1-supplement-1.pdf]

## Supplemental Material

**Table S1.** Full data set for WHICAP variant calling (*excel file*).

**Table S2.** Number of WHICAP *LPA* KIV2 Variants and appearance frequencies compared to 1000 Genome Cohort.

**Table S3A:** Ancestry carrier frequencies for WHICAP variants with significant associations to metabolic risk factors

**Table S3B:** Association of *LPA* KIV-2 variant vs. metabolic risk factors in WHICAP (*excel file*)

**Table S3C:** Association of *LPA* KIV-2 variant vs metabolic risk factors in WHICAP, adjusted by *LPA* KIV-2 CN (*excel file*)

**Table S3D** Linkage Disequilibrium between *LPA* KIV-2 variants significantly associated with hypertension (excel file)

**Table S4:** Association of *LPA* KIV-2 CN vs. *LPA* KIV-2 variants in WHICAP (excel file)

**Table S5:** Association of *LPA* KIV-2 CN with metabolic risk factors

**Table S6.** Baseline Characteristics: Pilot validation study

**Table S7.** Individual characteristic pilot cohort

**Table S8.** *LPA* KIV2 variant association with weighted isoform size (**S8A**) and Lp(a) serum levels (**S8B**) in Pilot Study individuals (N=27) (excel file).

**Figure S1.** WHICAP *LPA* KIV-2 Rare and Common Variants

**Figure S2.** Sex and ancestry distribution of exonic and intronic variants.
